# Supplementary material for: Ward round documentation in a major trauma centre: can we improve patient safety?
Source: PubMed Central journal article supplement — BMJ Qual Improv Rep. 2014 Nov 3;3(1):u206189.w2537. doi: 10.1136/bmjquality.u206189.w2537 (PMC4645937; doi:10.1136/bmjquality.u206189.w2537), 2014-11-03
Supplement: bmjqir-3-u206189-w2537-s1.pdf [file bmjqir-3-u206189-w2537-s1.pdf]

|         | Name       | Hosp #     | Date       | Time      | Cons       | EWS        | DVT       | Abx        | Plan      | D/c       | Sign      | Blp       |
|---------|------------|------------|------------|-----------|------------|------------|-----------|------------|-----------|-----------|-----------|-----------|
| Weekday | 100        | 100        | 100        | 97        | 100        | 100        | 95        | 100        | 97        | 97        | 82        | 97        |
| w/end   | 100        | 100        | 100        | 100       | 100        | 100        | 100       | 100        | 100       | 90        | 81        | 95        |
| Average | <b>100</b> | <b>100</b> | <b>100</b> | <b>98</b> | <b>100</b> | <b>100</b> | <b>97</b> | <b>100</b> | <b>98</b> | <b>95</b> | <b>82</b> | <b>97</b> |

**Percentage compliance for each criterion: 2<sup>nd</sup> loop (April 2014)**

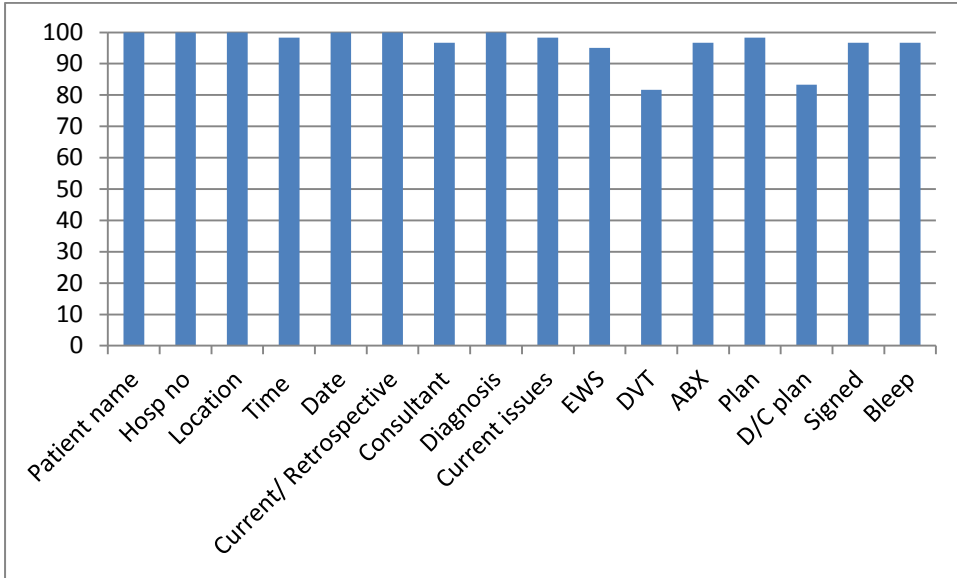

Graph showing percentage compliance for each criterion in loop 2.

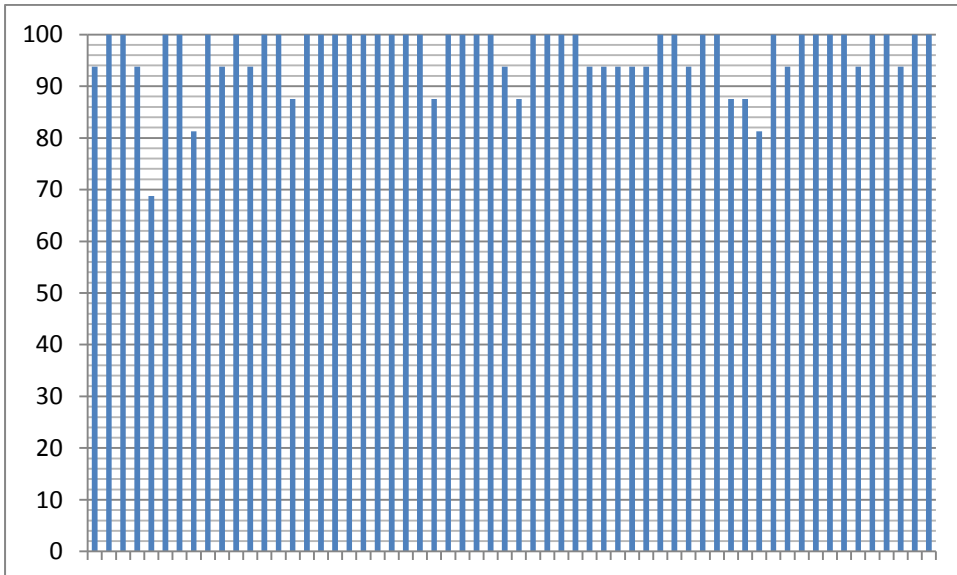

Graph showing percentage of criteria met per entry in loop 2.

|         | Name | Hosp # | Date | Time | Cons | EWS | DVT | Abx | Plan | D/c | Sign | Blp |
|---------|------|--------|------|------|------|-----|-----|-----|------|-----|------|-----|
| Weekday | 100  | 100    | 100  | 100  | 100  | 98  | 91  | 89  | 100  | 75  | 100  | 100 |
| w/end   | 100  | 100    | 100  | 100  | 100  | 94  | 88  | 88  | 100  | 63  | 100  | 100 |
| Average | 100  | 100    | 100  | 100  | 100  | 96  | 100 | 89  | 100  | 69  | 100  | 100 |

**Percentage compliance for each criterion: 3<sup>rd</sup> loop (August 2014)**

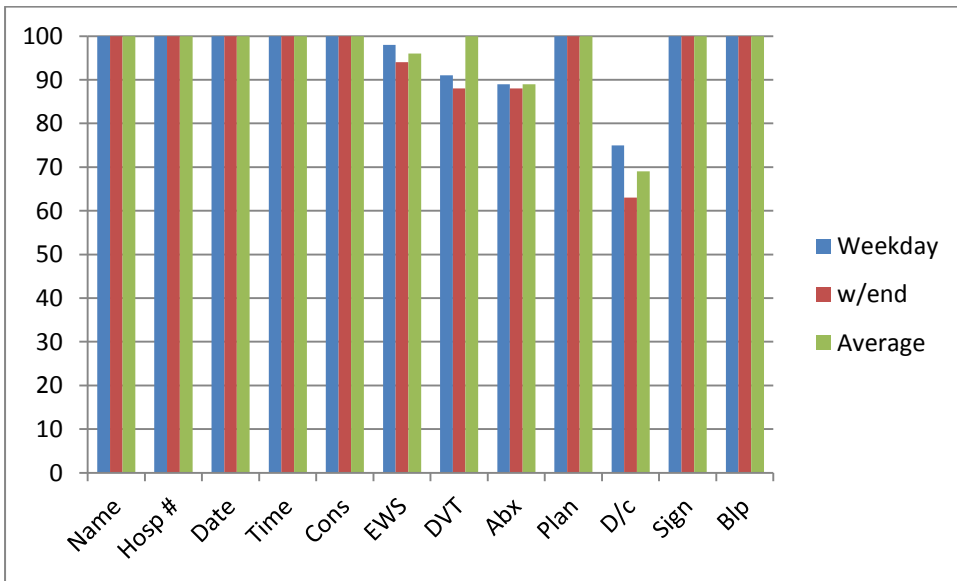

Graph showing percentage compliance for each criterion in loop 3.

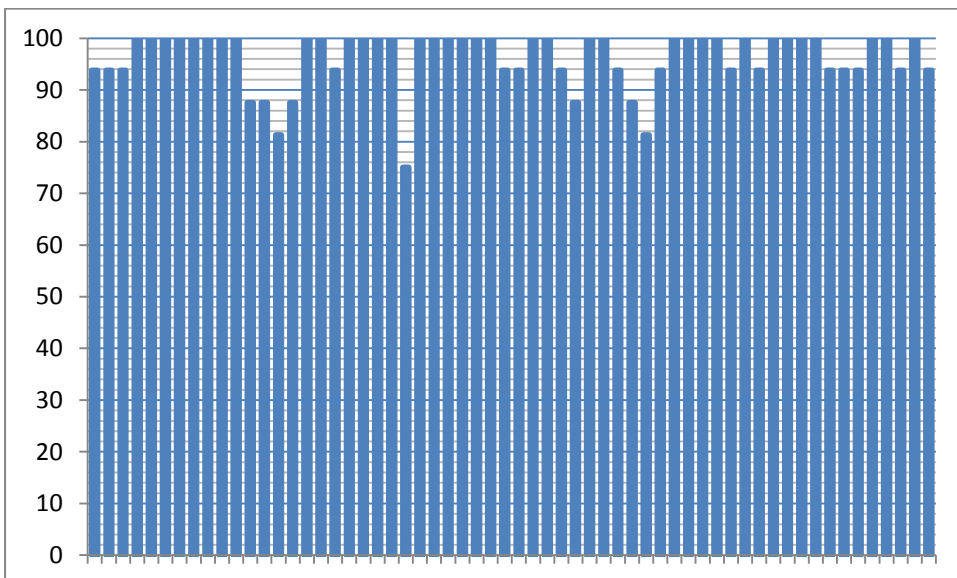

Graph showing percentage of criteria met per entry in loop 3.
