# Supplementary material for: Ward round documentation in a major trauma centre: can we improve patient safety?
Source: PubMed Central journal article supplement — BMJ Qual Improv Rep. 2014 Nov 3;3(1):u206189.w2537. doi: 10.1136/bmjquality.u206189.w2537 (PMC4645937; doi:10.1136/bmjquality.u206189.w2537), 2014-11-03
Supplement: bmjqir-3-u206189-w2537-s2.pdf [file bmjqir-3-u206189-w2537-s2.pdf]

|         | Name      | Hosp #    | Date      | Time      | Cons      | EWS       | DVT       | Abx      | Plan      | D/c       | Sign     | Blp      |
|---------|-----------|-----------|-----------|-----------|-----------|-----------|-----------|----------|-----------|-----------|----------|----------|
| Weekday | 92        | 90        | 46        | 33        | 94        | 33        | 92        | 10       | 63        | 56        | 4        | 2        |
| w/end   | 100       | 100       | 35        | 0         | 100       | 0         | 100       | 15       | 88        | 88        | 8        | 8        |
| Average | <b>89</b> | <b>85</b> | <b>51</b> | <b>49</b> | <b>95</b> | <b>49</b> | <b>92</b> | <b>8</b> | <b>59</b> | <b>53</b> | <b>4</b> | <b>3</b> |

**Initial results: Percentage compliance with RCS guidelines**

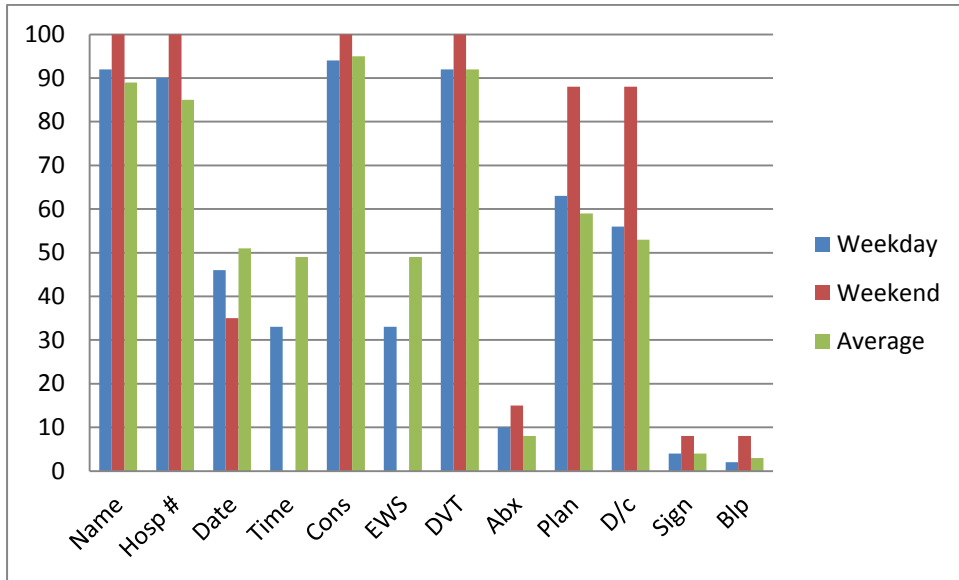

Graph showing initial percentage compliance with RCS guidelines.

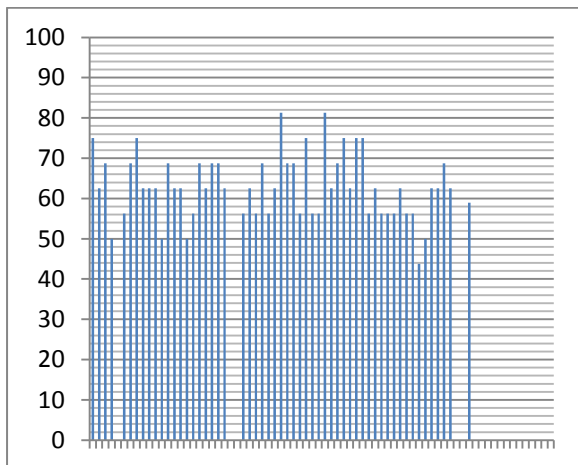

Graph showing percentage of criteria met per entry in loop 1.

Green  
Gemma  
9/24/1992 Female  
1234569

Gunning Bishop

17/03/2014 Ward Round Mr Bishop

:      **Diagnosis:**                      Broken finger nail  
       **Date of admission:**            1/1/2010  
       **Procedure & date :**                ORIF 02/01/2010

**Current issues:**                    change of dressing on ward  
**round**

**Bloods/XRs:**                        HB112

**Current antimicrobial therapy:**    None required

**DVT prophylaxis:**                    None required

**Bowels/Fluid charts:**

**EWS/AMTS/ Pain score:**

**Discharge plan/ Social situation:**    Manicure tomorrow

**Consultant daily plan:**

Signed:

Bleep:

Example of word document  
prefilled with data from  
spreadsheet with space for  
consultant daily plan.
